# Supplementary material
Source: Springer Nature journal article supplement (https://www.springermedizin.de/resource/supplementary/12993_2005_115_MOESM1_ESM.pdf/9617108)

### NORMAL

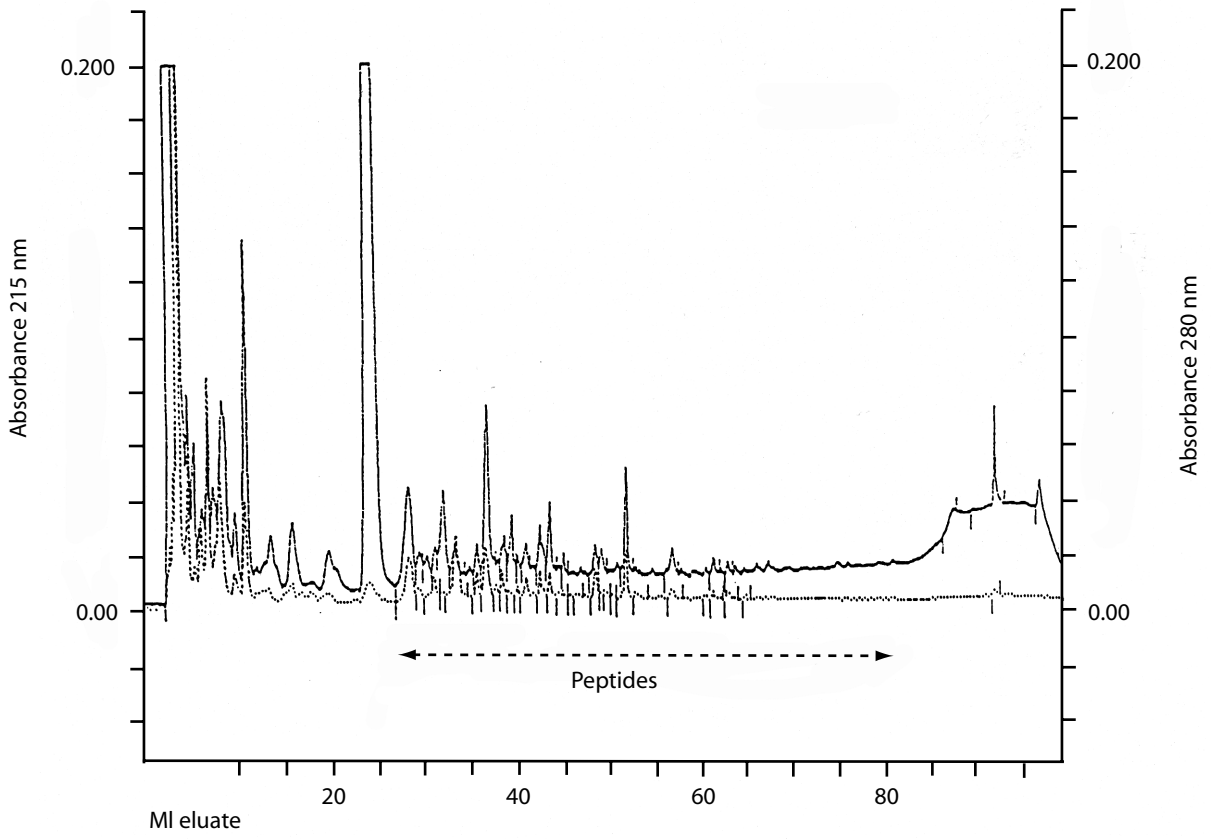

### DEPRESSION

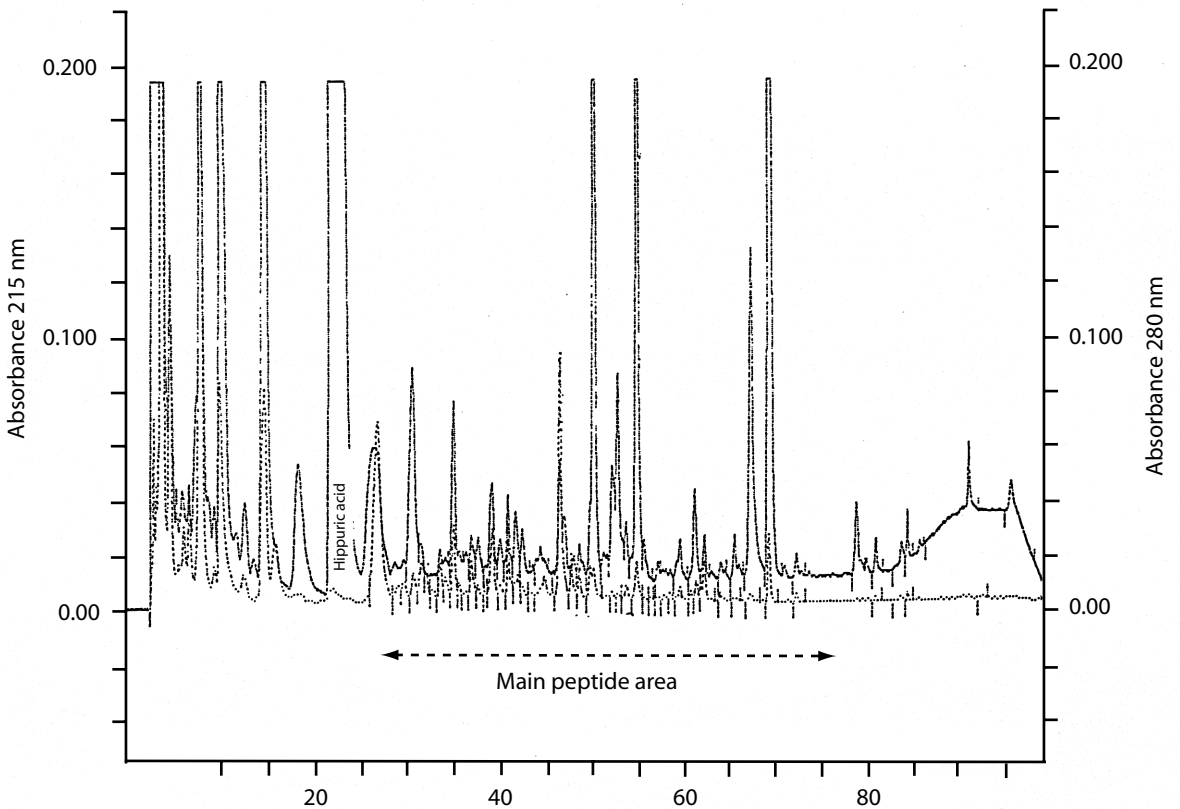

Supplement: MOESM1 [file 9617108]
